# Supplementary material for: Exercise attenuates high-fat diet-induced PVAT dysfunction through improved inflammatory response and BMP4-regulated adipose tissue browning
Source: PubMed Central journal article supplement (PMC11111863; doi:10.3389/fnut.2024.1393343), 2024-05-09
Supplement: Image_1.pdf [file Image_1.pdf]

## Supplementary Material

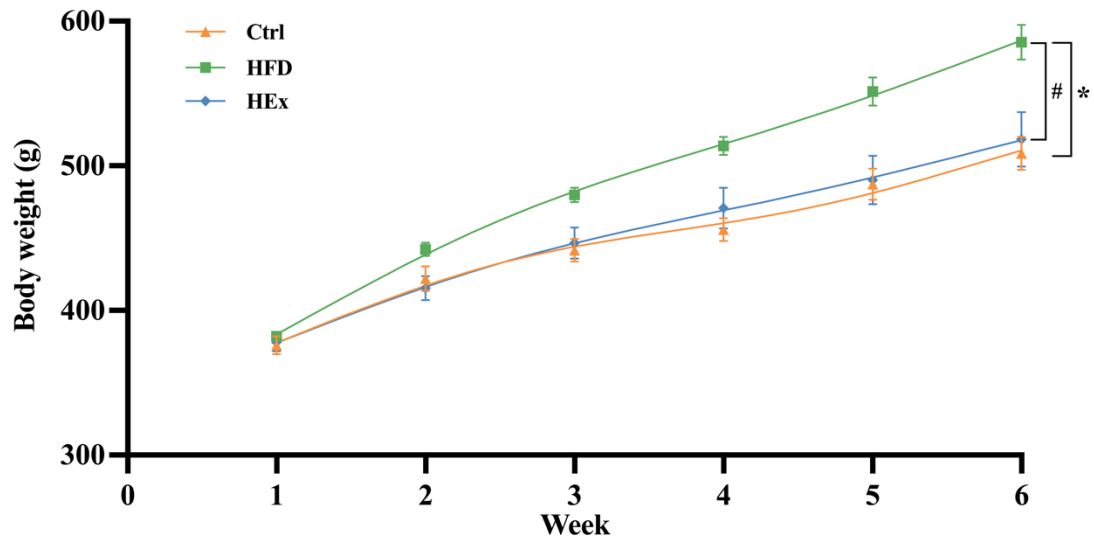

**Supplementary Figure 1.** The effects of aerobic exercise on body weight gain in rats fed a high-fat diet ( $n = 6$ ). Data are presented as mean  $\pm$  SEM. Results are significant compared with control  $^*p < 0.05$ ; compared with HFD  $^{\#}p < 0.05$ .
